# Supplementary material for: Impact of intracellular glyceraldehyde-derived advanced glycation end-products on human hepatocyte cell death
Source: PubMed Central journal article supplement (PMC5660208; doi:10.1038/s41598-017-14711-3), 2017-10-27
Supplement: 41598_2017_14711_MOESM1_ESM.pdf [file 41598_2017_14711_MOESM1_ESM.pdf]

## **Supplemental Information**

### **Impact of intracellular glyceraldehyde-derived advanced glycation end-products on human hepatocyte cell death**

Akiko Sakasai-Sakai, Takanobu Takata, Jun-ichi Takino, & Masayoshi Takeuchi

## **Materials and methods**

### **Detection of Annexin V/PI staining cells under fluorescent microscope.**

Cells grown on 12-mm collagenized coverslips in 24-well plates were washed with cold-PBS and then washed with 1×Annexin-binding buffer. These cells were stained using the Dead Cell Apoptosis Kit according to the manufacturer's instructions. These stained cells were observed using a fluorescence microscope (model BZ-9000; Keyence, Osaka, Japan).

Control

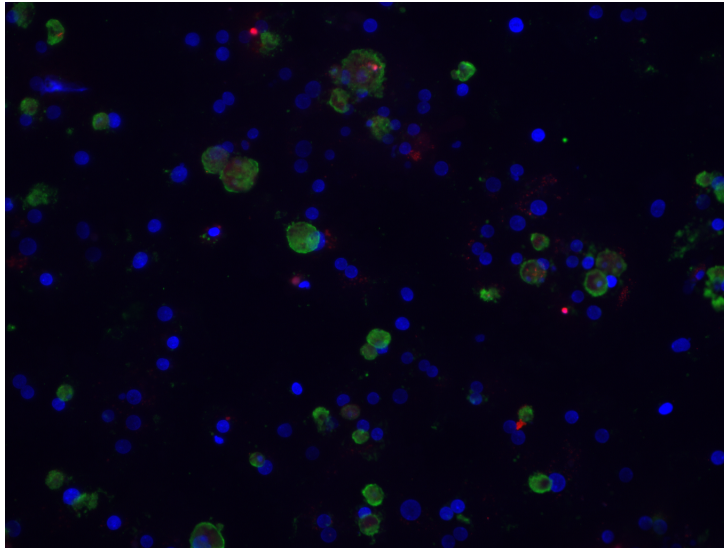

GA

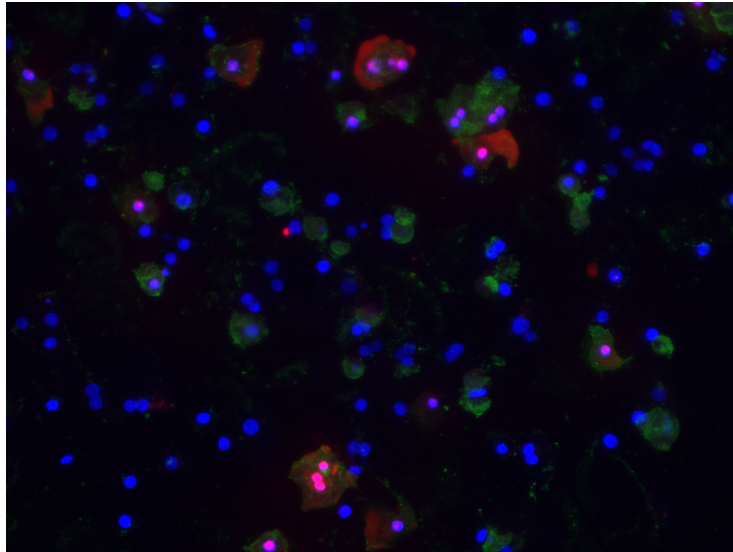

Supplementary Figure S1.

Annexin V/PI double staining of human primary hepatocytes. Human primary hepatocytes were treated with 4 mM of GA for 24 h and stained with Annexin V/PI. Annexin V-positive cells (green fluorescence) indicate early apoptosis. PI-positive cells (red fluorescence) indicate necrosis.

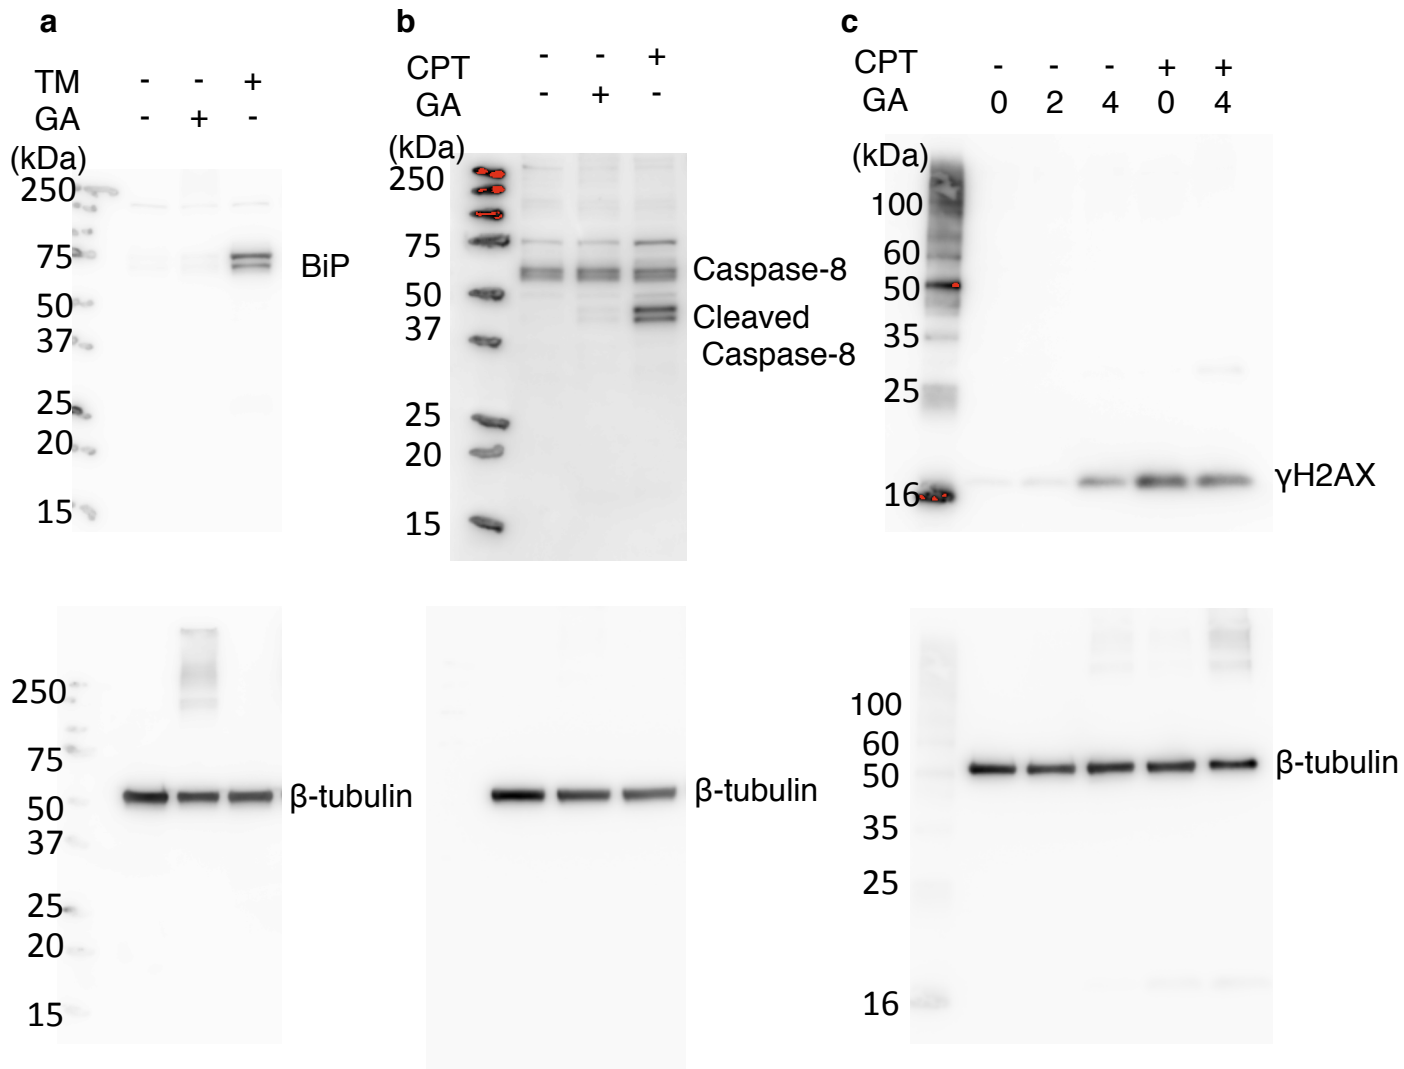

Supplementary Figure S2.  
Full-length blot of Figure 2a-c.

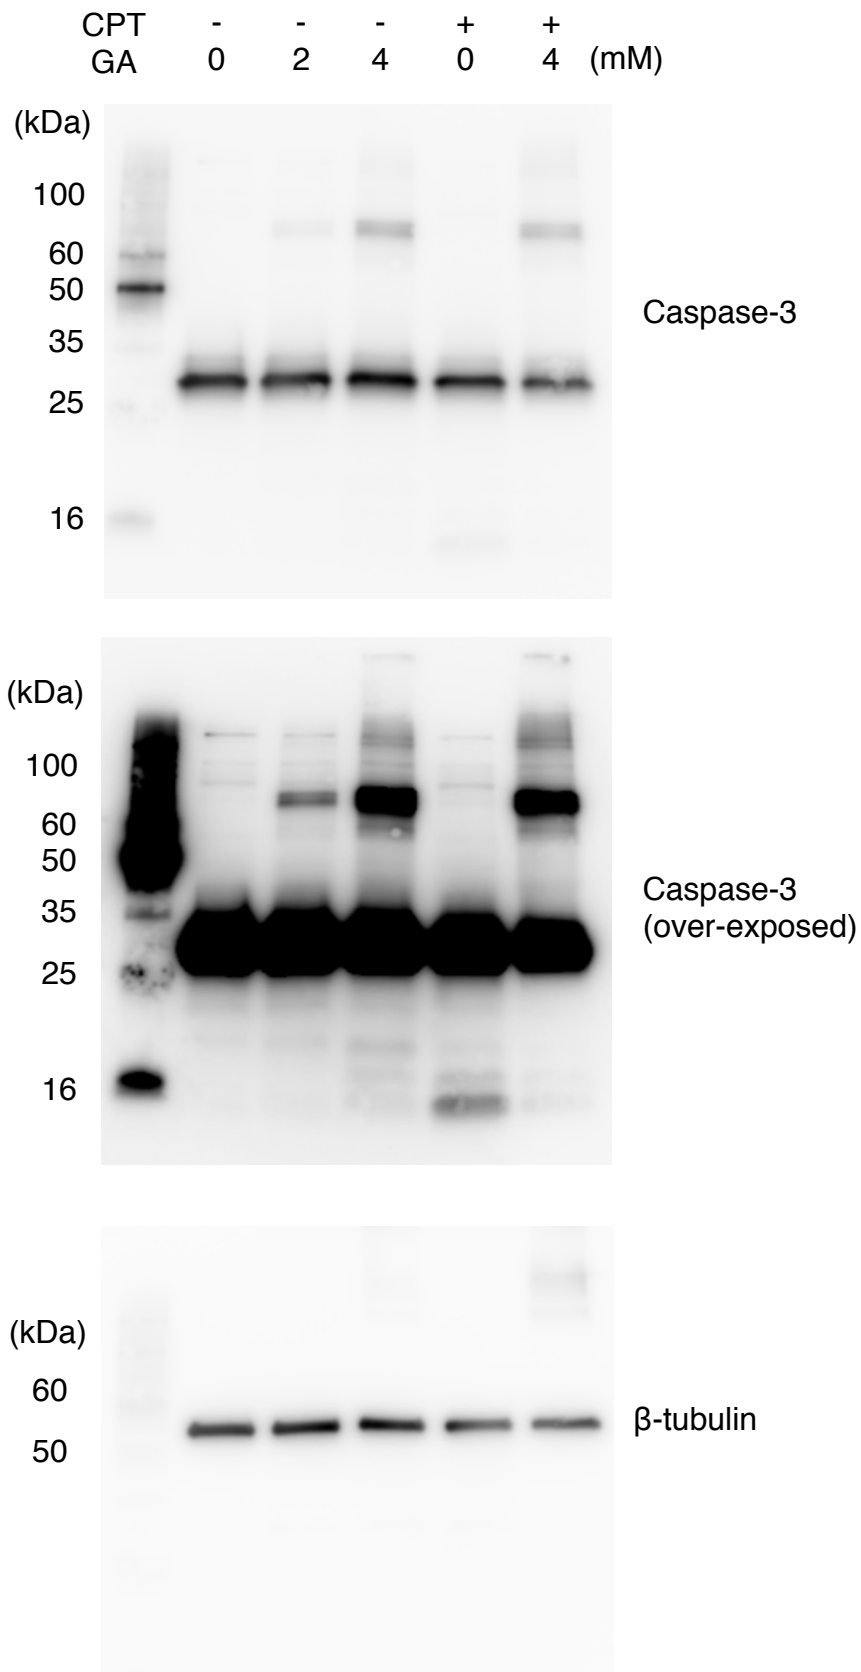

Supplementary Figure S3.

Full-length blot of Figure 4a. The middle panel of the blot was over-exposed on purpose in order to detect cleaved caspase-3.

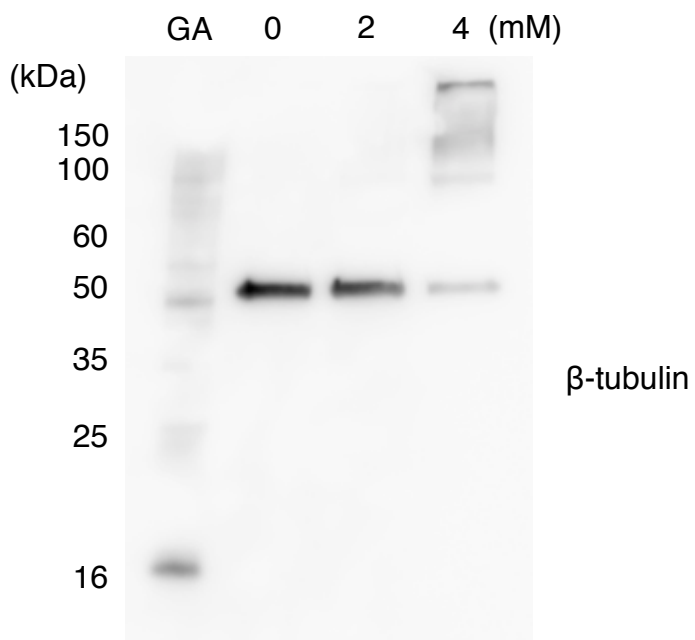

Supplementary Figure S4.  
Full-length blot of  $\beta$ -tubulin in Figure 4b.

|    |   |    |   |   |   |   |    |      |
|----|---|----|---|---|---|---|----|------|
| AG | 0 | 16 | 0 | 2 | 4 | 8 | 16 | (mM) |
| GA | 0 | 0  | 4 | 4 | 4 | 4 | 4  | (mM) |

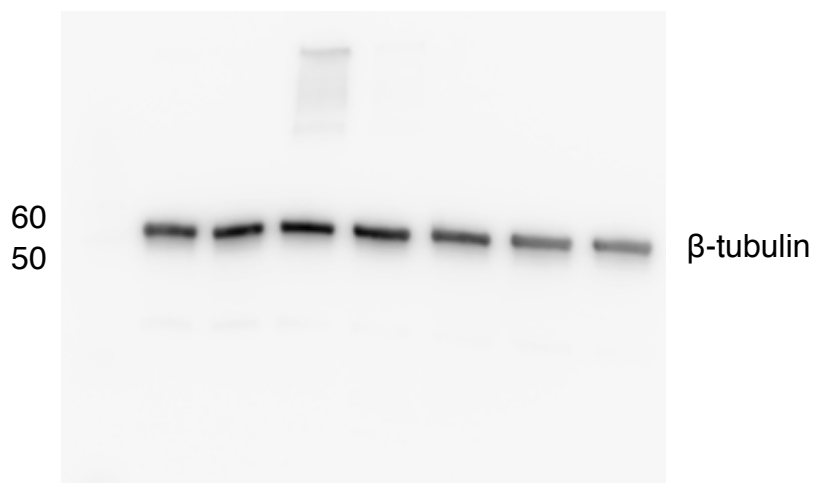

Supplementary Figure S5.  
Full-length blot of  $\beta$ -tubulin in Figure 4c.

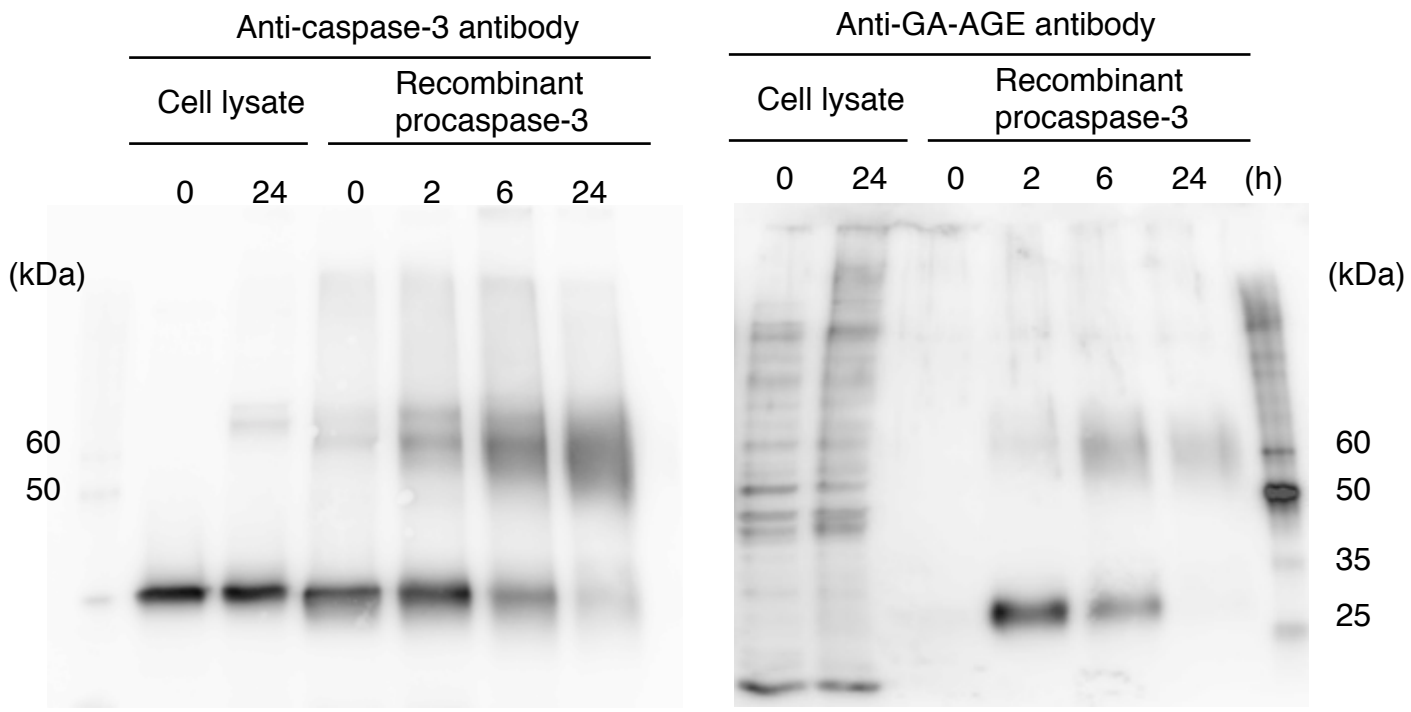

Supplementary Figure S6.  
Full-length blot of Figure 4d.



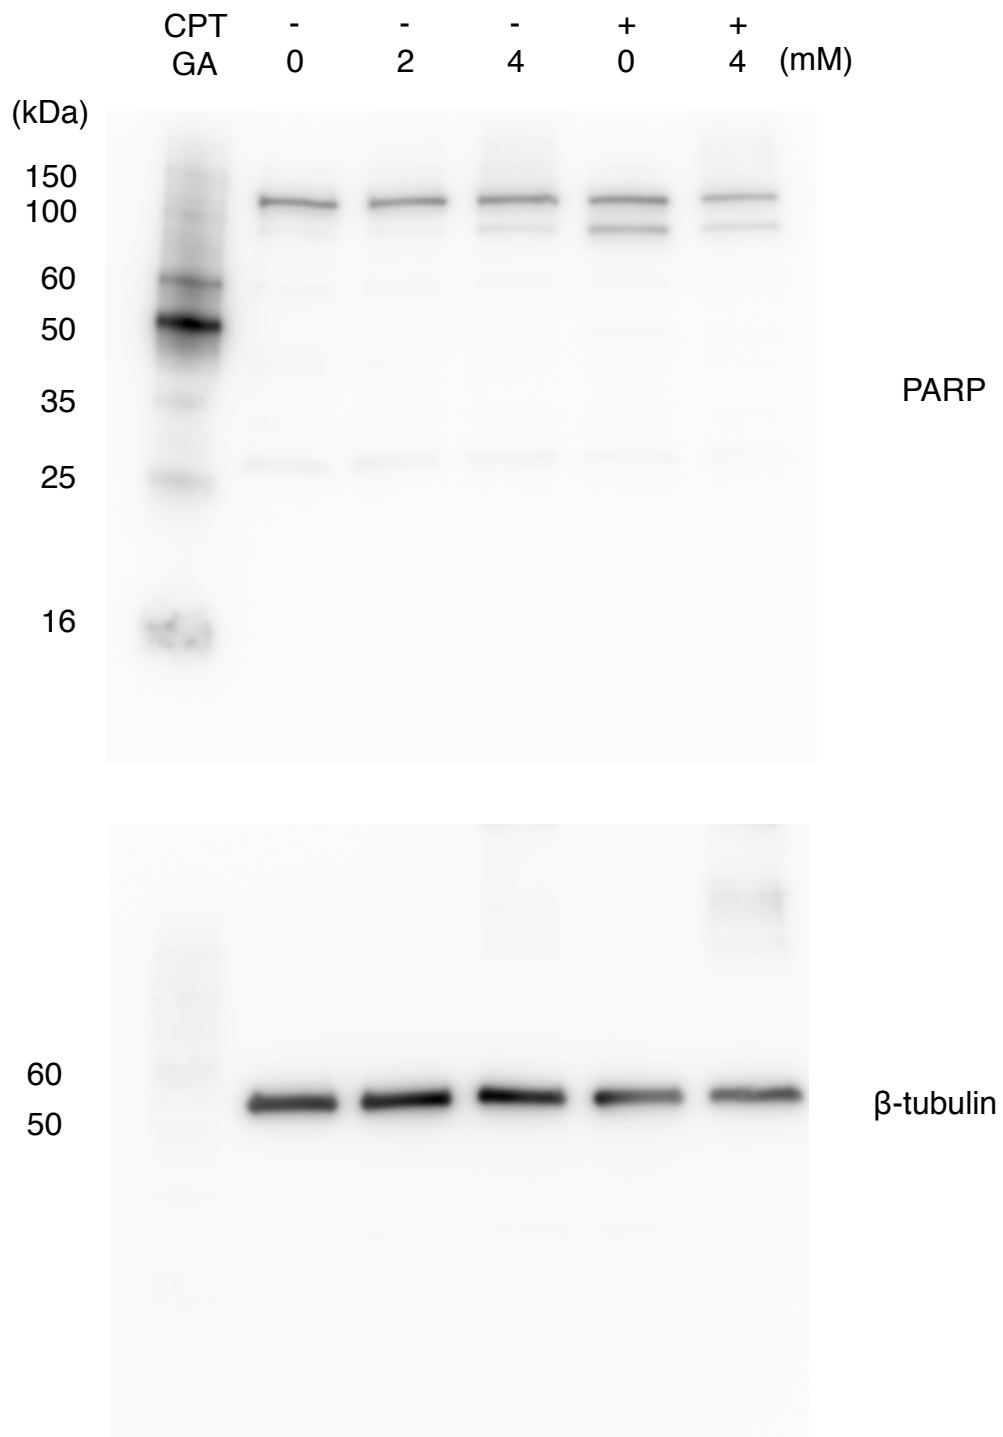

Supplementary Figure S7.  
Full-length blot of Figure 5b.
